# Supplementary material
Source: publisher site journal article supplement (https://www.dovepress.com/get_supplementary_file.php?f=246299.docx)

Supplementary Figure 1. Effects of HOTAIR overexpression on cisplatin resistance in NSCLC cells. A549 and H1299 cells were transfected with pcDNA-HOTAIR (HOTAIR) or its negative control (vector). (A) RT-qPCR assay showed HOTAIR expression levels after transfection for 24 h. (B) IC50 values of DDP were determined by CCK-8 assay after treated with different concentrations (10, 20, 40, 60, 80, and 100 μM) of DDP for 48 h. (C, D) CCK-8 assay detected cell viability after transfection for 0, 24, 48 and 72 h. (E, F) Transwell assays measured cell migration and invasion after transfection for 24 h. The cell migration/invasion ability was calculated as % of total cells. **P* < 0.05.


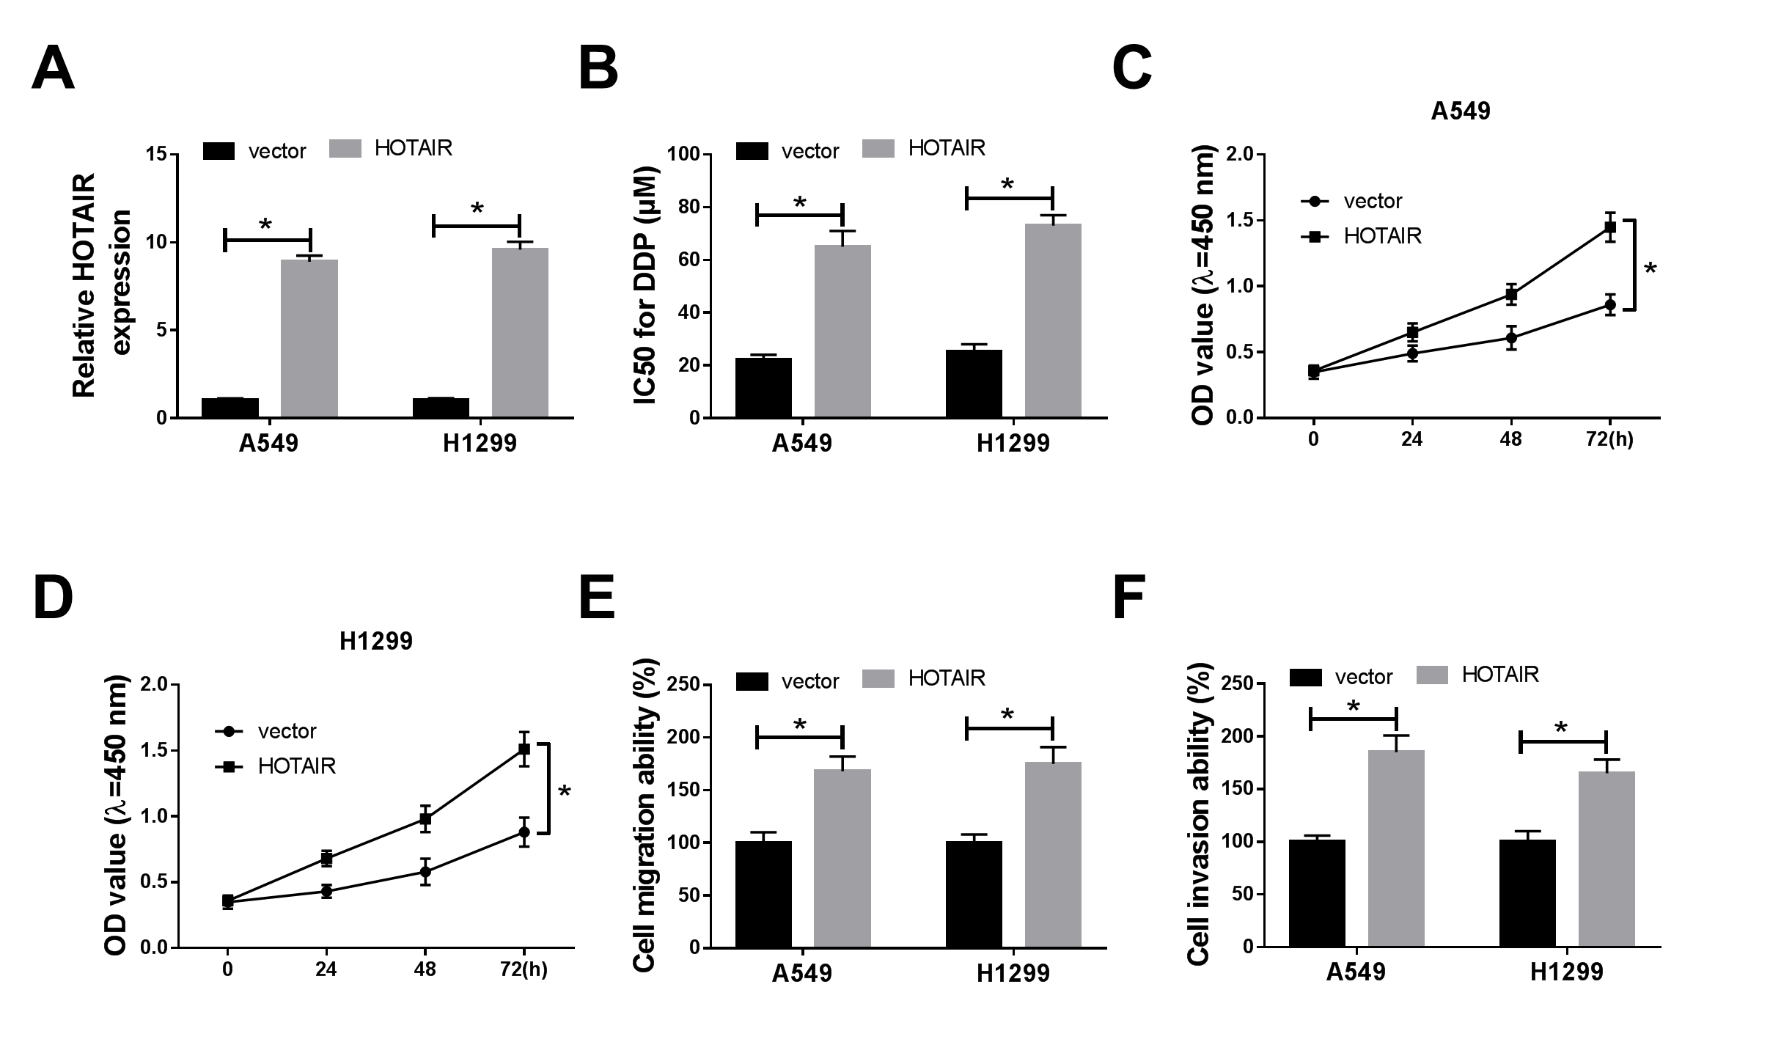

Supplement: Supplementary file 1 [file get_supplementary_file.php]
